# Supplementary material
Source: Springer Nature journal article supplement (https://www.springermedizin.de/resource/supplementary/12885_2013_4584_MOESM1_ESM.pdf/9466718)
Supplement: MOESM1 [file 9466718]

21,680,686 subjects for all insured population

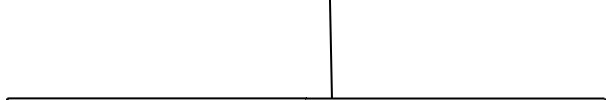

633,680 patients with type2 diabetes in 1997-1998

12,202,122 Excluded  
8,910 Type I DM  
2,401,786 Any cancer  
2,735,586 having any diabetes in 1996-2007  
7,055,840 Age<20

156,489 Excluded  
3,750 Type I DM  
135,060 Any cancer  
17,679 Age<20

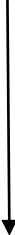

477,191 subjects were eligible

9,478,564 subjects without diabetes were eligible

4,212 Without information for gender and area registered for National Health Insurance program

67,315 Without information for gender and area registered for National Health Insurance program

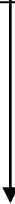

472,979 participants were included for analysis

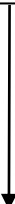

9,411,249 participants were included for analysis
